# Supplementary material
Source: Springer Nature journal article supplement (https://www.springermedizin.de/resource/supplementary/12939_2009_162_MOESM2_ESM.pdf/9551630)
Supplement: MOESM2 [file 9551630]

# Non-prescribed

# Prescribed

**% Women**

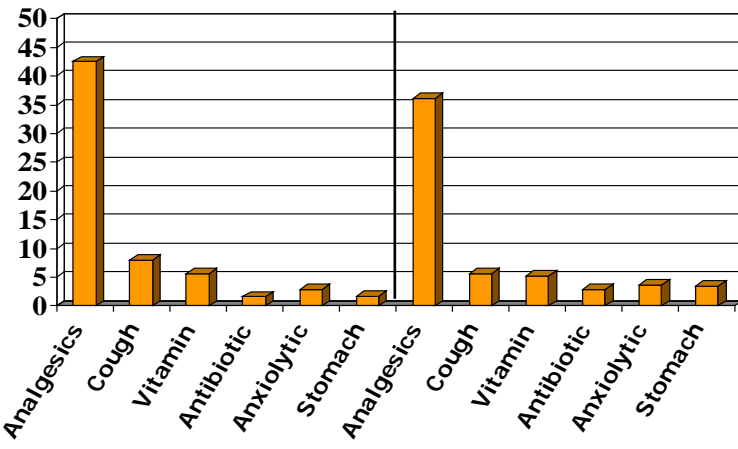

**% Women**

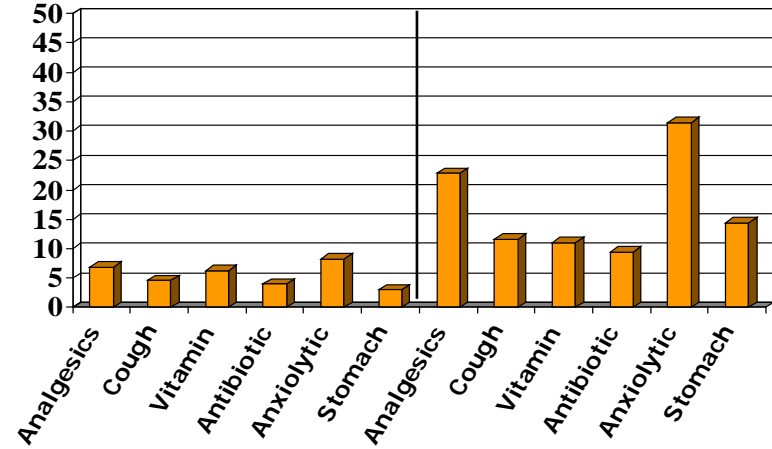

**Good PHS**

**Poor PHS**

**Good PHS**

**Poor PHS**

**% Men**

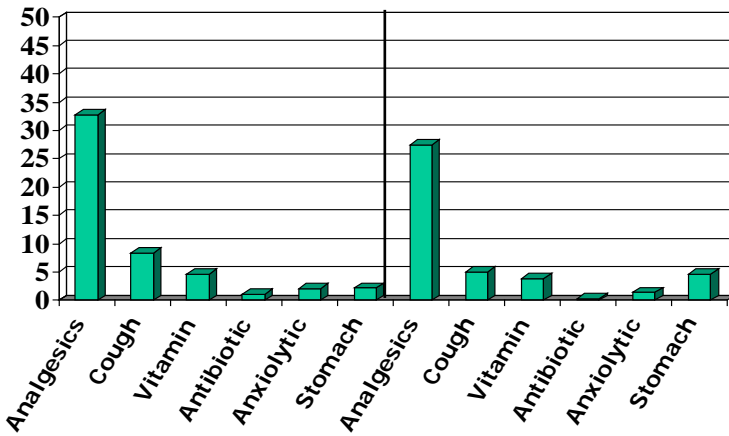

**% Men**

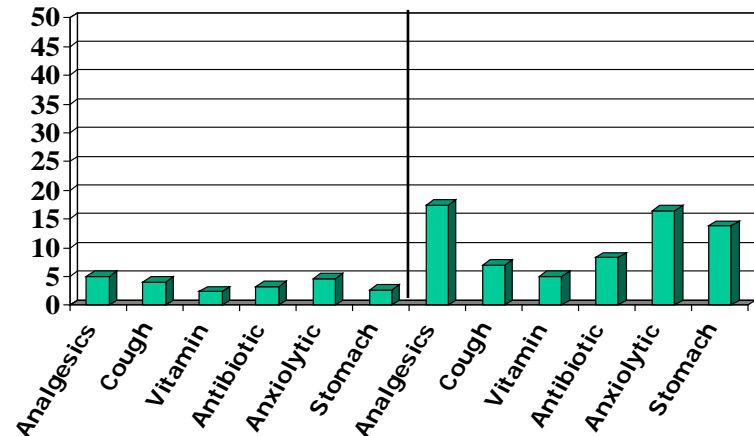

**Good PHS**

**Poor PHS**

**Good PHS**

**Poor PHS**
